# Supplementary material for: Prenatal ethanol exposure enhances the susceptibility to depressive behavior of adult offspring rats fed a high-fat diet by affecting BDNF-associated pathway
Source: PubMed Central journal article supplement — Int J Mol Med. 2019 Dec 19;45(2):365–74. doi: 10.3892/ijmm.2019.4436 (PMC6984802; doi:10.3892/ijmm.2019.4436), 2019-12-19
Supplement: Supplementary_Data.pdf [file Supplementary_Data.pdf]

Table SI. Rat oligonucleotide primers and PCR annealing temperature used in RT-qPCR.

| Genes        | Forward primer         | Reverse primer         | Product (bp) | Annealing    |
|--------------|------------------------|------------------------|--------------|--------------|
| <i>MR</i>    | TGCATGATCTCGTGAGTGA    | AAGTTCTTCCTGGCCGGTAT   | 190          | 63°C, 20 sec |
| <i>GR</i>    | CACCCATGACCCTGTCAGTC   | AAAGCCTCCCTCTGCTAACC   | 156          | 60°C, 20 sec |
| <i>CREB</i>  | AGCAGATTCTAGTGCCCAGC   | GGACGCCATAACAACCTCCAG  | 119          | 60°C, 30 sec |
| <i>BDNF</i>  | AGCCTCCTCTGCTCTTTCTG   | ATGGGATTACACTTGGTCTCG  | 259          | 59°C, 30 sec |
| <i>TrkB</i>  | CCTCGTTGGAGAAGATCAAG   | CGTGGTACTCCGTGTGATTG   | 221          | 60°C, 30 sec |
| <i>GAPDH</i> | TAAAGAACAGGCTCTTAGCACA | AGTCTTGGAAATGGATTGTCTC | 107          | 59°C, 15 sec |

MR, Mineralocorticoids receptor; GR, glucocorticoids receptor; BDNF, brain-derived neurotrophic factor; CREB, cAMP responsive element binding protein; TrkB, tropomyosin-related kinase B; GAPDH, glyceraldehyde 3-phosphate dehydrogenase.

Table SII. Rat primers of target genes in GenomeLab GeXP Genetic Analysis system.

| Genes            | Forward primer          | Reverse primer        |
|------------------|-------------------------|-----------------------|
| <i>MR</i>        | GAAGTGGGCCAAGGTA CTTC   | CAACTCAAAGCGAACGATGA  |
| <i>GR</i>        | CACCCATGATCCTGTCAGTC    | AAAGCCTCCCTCTGCTAACC  |
| <i>CREB</i>      | AGCAGATTCTAGTGCCCAGC    | GGACGCCATAACA ACTCCAG |
| <i>BDNF</i>      | TGTTGGGGAGACGAGATTTT    | TCATGCAACCGAAGTATGAAA |
| <i>TrkB</i>      | CCTCGTTGGAGAAGATCAAG    | CGTGGTACTCCGTGTGATTG  |
| <i>NR1</i>       | CAATAAGCGACACGGCTCTT    | GCGGGTGGCTAACTAGGATA  |
| <i>NR2A</i>      | GATGACAACCACCTCAGCATT   | CATCCCTTCGTTGGTTGAAT  |
| <i>NR2B</i>      | CAATGTCAC TTTTGAAGGGAGA | TCCGAGGCCACACATAACT   |
| <i>GluA 2</i>    | ATGGTGTCTCCCATCGAAAG    | CCTCACA AACACAGAGGGCT |
| <i>GAPDH</i>     | GGCACAGTCAAGGCTGAGAATG  | ATGGTGGTGAAGACGCCAGTA |
| <i>Syn 1</i>     | TCAGCAGCAC AACATACCCT   | TGGACACGCACATCGTATTT  |
| <i>SNAP25</i>    | TCCGTCATATGGCCCTAGAC    | TCTCTTGTCCAACAACATTGG |
| <i>CyclinA</i>   | TTGGTAGCAGCAGCAGCTTA    | GAGGGACACGTGCAGGTACT  |
| <i>RhoA</i>      | TGTGTTTTTCCATCGACAGC    | GTACCCAAAAGCGCCAATC   |
| <i>Rac1</i>      | TGTGAGTCCTGCATCATTGA    | TCGCTGTGTGAGTGCTGAG   |
| <i>Cdc42</i>     | AGTATGTGGAGTGTTCGGCC    | GGTAGGTGCAGGTCGTCTGT  |
| <i>Cdk2</i>      | GGAGCTCAATCACCC TAACATC | GACCCCTCTGCGTTGATAAG  |
| <i>Caspase 8</i> | GTAAACTTTGGCGGACTG      | AGCCTCTGAAATAGCACC    |
| <i>bcl-2</i>     | GTGGCCTTCTTTGAGTTCGG    | AGGTATGCACCCAGAGTGATG |
| <i>Tubb3</i>     | TCTAGCCGAGTGAAGTCAGCA   | GGCCTGAATAGGTGTCCAAAG |

MR, Mineralocorticoids receptors; GR, glucocorticoids receptor; CREB, cAMP responsive element binding protein; BDNF, brain-derived neurotrophic factor; TrkB, tropomyosin-related kinase B; NR1, glutamate receptor, ionotropic, N-methyl D-aspartate 1; NR2A, glutamate receptor, ionotropic, N-methyl D-aspartate 2A; NR2B, glutamate receptor, ionotropic, N-methyl D-aspartate 2B; GluA 2, glutamate receptor, ionotropic, AMPA 2; GAPDH, glyceraldehyde 3-phosphate dehydrogenase; Syn 1, synapsin I, transcript variant a; SNAP25, synaptosomal-associated protein 25; CyclinA, cell cycle protein A; RhoA, ras homolog gene family, member A; Rac1, ras-related C3 botulinum toxin substrate; Cdc42, cell division cycle 42; Cdk2, cyclin dependent kinase 2; Caspase 8, cysteine-aspartic acid protease 8; bcl-2, B-cell CLL/lymphoma 2; Tubb3, *Rattus norvegicus* tubulin, beta 3.
